# Supplementary material
Source: publisher figshare collection journal article supplement (https://karger.figshare.com/ndownloader/files/8712619)
Supplement: Supplementary file 1 [file 8712619]

**Supplemental Table 1. Comparisons left ventricular ejection fraction using the linear mixed model during follow-up period.**

| time | Follow-up time | Estimate | Standard Error | P valuea | Lower | Upper |
| --- | --- | --- | --- | --- | --- | --- |
| 0 | 3 | 1.4527 | 0.5677 | 0.0117 | 0.3291 | 2.5763 |
| 0 | 6 | 2.2613 | 0.591 | 0.0002b | 1.0916 | 3.4309 |
| 0 | 9 | 1.3654 | 0.5674 | 0.0176 | 0.2423 | 2.4885 |
| 0 | 12 | 1.4085 | 0.7461 | 0.0614 | -0.06819 | 2.8852 |
| 3 | 6 | 0.8086 | 0.5255 | 0.1265 | -0.2316 | 1.8488 |
| 3 | 9 | -0.08732 | 0.5948 | 0.8835 | -1.2645 | 1.0899 |
| 3 | 12 | -0.0442 | 0.7302 | 0.9518 | -1.4895 | 1.4011 |
| 6 | 9 | -0.8959 | 0.5739 | 0.1211 | -2.0319 | 0.2401 |
| 6 | 12 | -0.8528 | 0.7224 | 0.2401 | -2.2827 | 0.5771 |
| 9 | 12 | 0.04312 | 0.6566 | 0.9478 | -1.2566 | 1.3428 |

a P calculated by Bonferroni’s test in linear mixed model

b P less than 0.005 was considered statistically significant because 10 multiple

comparisons were conducted among follow-up intervals.

**Supplemental Table 2. Detailed values of left ventricular ejection fraction during a follow-up period.**

| **time** | **Mean** | **Standard deviation** | **Minimum** | **Maximum** |
| --- | --- | --- | --- | --- |
| 0 | 64.8548 | 5.3048 | 55 | 79 |
| 3 | 63.3277 | 6.8496 | 37 | 78 |
| 6 | 62.6973 | 6.3778 | 37 | 77 |
| 9 | 63.4330 | 6.4838 | 40 | 75 |
| 12 | 63.3214 | 6.6636 | 42 | 76 |
